# Supplementary material for: Molecular level characterisation of ion-exchange water treatment coupled to ceramic membrane filtration
Source: Royal Society of Chemistry journal article supplement (doi:10.1039/c9ew01042d), 2020-01-01
Supplement: c9ew01042d1.pdf [file c9ew01042d1.pdf]

## Supplementary information

Molecular level characterisation of ion-exchange water treatment coupled to ceramic membrane filtration

Alan J. R. Smith<sup>a</sup>, Graeme Moore<sup>b</sup>, Andrea J.C. Semiao<sup>c</sup>, Dušan Uhrin<sup>a\*</sup>

<sup>a</sup> EaStCHEM School of Chemistry, University of Edinburgh, Joseph Black Building, David Brewster Rd, Edinburgh EH9 3FJ, UK.

<sup>b</sup> Scottish Water, Castle House, 6 Castle Drive, Dunfermline KY11 8GG, UK

<sup>c</sup> School of Engineering, Institute for Infrastructure and Environment, University of Edinburgh, Edinburgh EH8 9YL, UK.

### Table of Content

|                                                                                                        |   |
|--------------------------------------------------------------------------------------------------------|---|
| <b>Fig. S1.</b> Schematic setup of the pilot plant.....                                                | 2 |
| <b>Fig. S2.</b> A detailed diagram of the SIX treatment stage.....                                     | 2 |
| <b>Fig. S3.</b> Schematic setup of the WTW.....                                                        | 2 |
| <b>Fig. S4.</b> UpSet plot of raw, SIX and ILCA-CMF treated June pilot plant samples.....              | 3 |
| <b>Fig. S5.</b> Van Krevelen plot of June ILCA-CMF and SIX treated samples.....                        | 3 |
| <b>Fig. S6.</b> $Al_{mod}$ plot for the June pilot plant samples.....                                  | 4 |
| <b>Fig. S7.</b> Oxygen series plot for pilot plant June samples.....                                   | 4 |
| <b>Fig. S8.</b> Relative integrals of regions of $^1H$ NMR spectra for the pilot plant June samples... | 4 |
| <b>Fig. S9.</b> ATR-FT-IR spectra of July pilot plant samples.....                                     | 5 |
| <b>Fig. S10.</b> PCA scores plot of the ATR-FT-IR spectra.....                                         | 5 |
| <b>Table S1.</b> $m/z$ and associated formulae used to calibrate FT-ICR-MS spectra.....                | 6 |

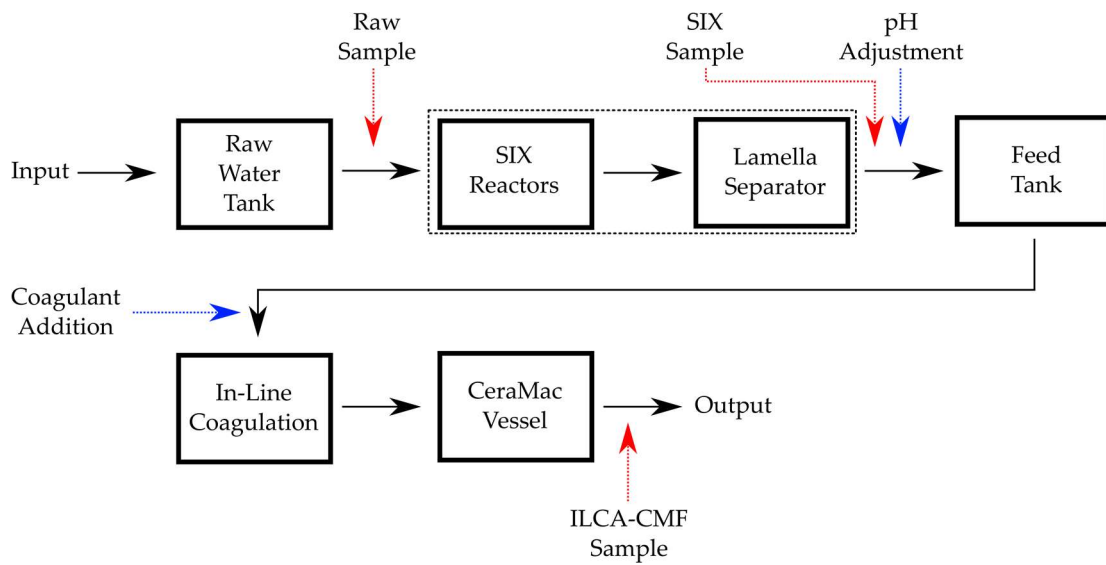

**Fig. S1.** Schematic setup of the pilot plant. Dashed boxed area is expanded in Fig. S9. Red arrows indicate sampling points.

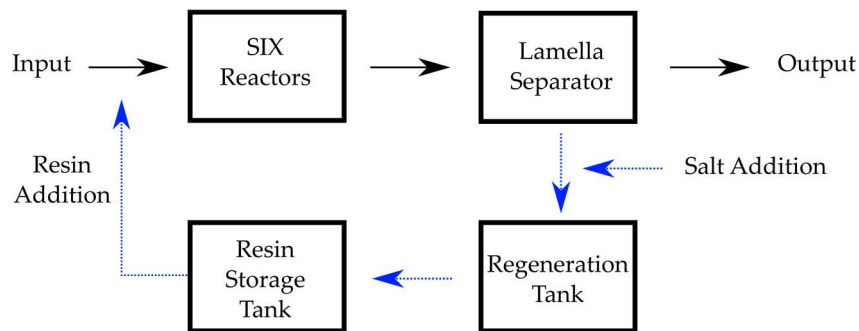

**Fig. S2.** A detailed diagram of the SIX treatment stage.

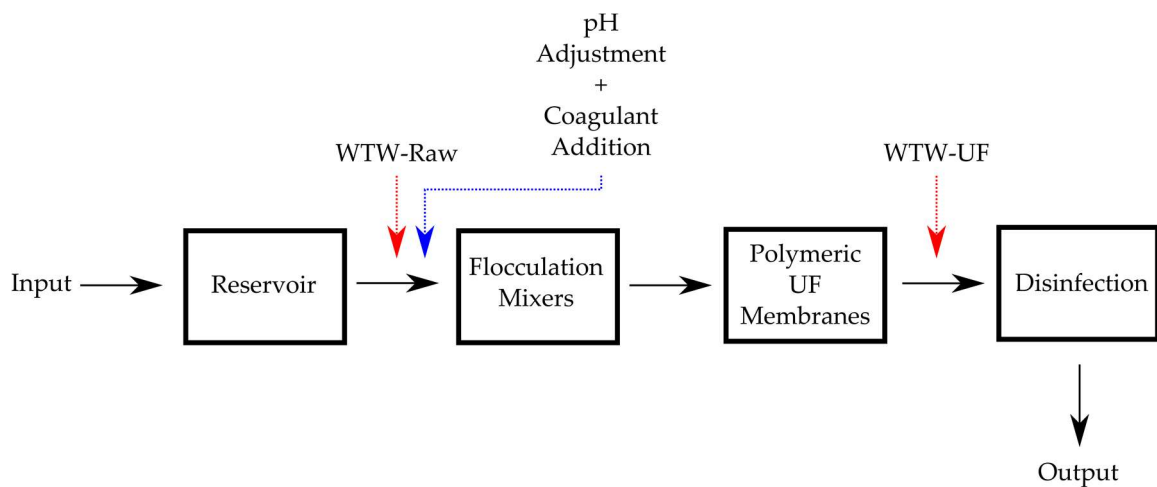

**Fig. S3.** A schematic diagram of the WTW. Red arrows indicate sampling points.

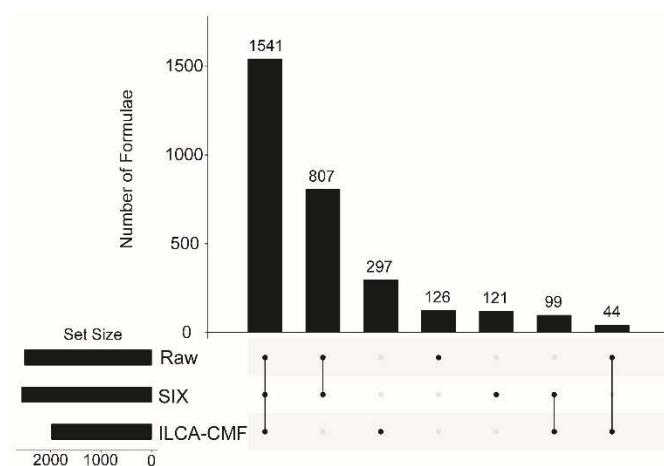

**Fig. S4.** Upset plot of raw, SIX and ILCA-CMF treated June pilot plant samples. Large similarities between the untreated DOM and SIX treated DOM are visible, as well as significant loss of species after the ILCA-CMF treatment.

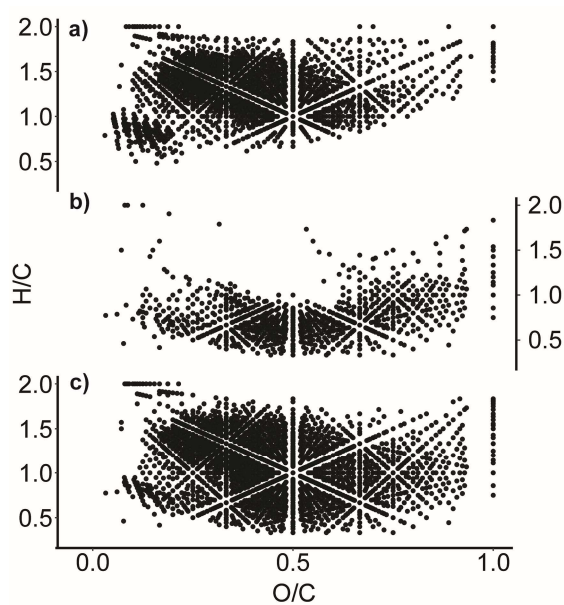

**Fig. S5.** Van Krevelen plots for June samples. (a) all formulae identified in the ILCA-CMF treated sample; (b) formulae lost after the ILCA-CMF treatment; (c) all formulae identified in the SIX treated sample.

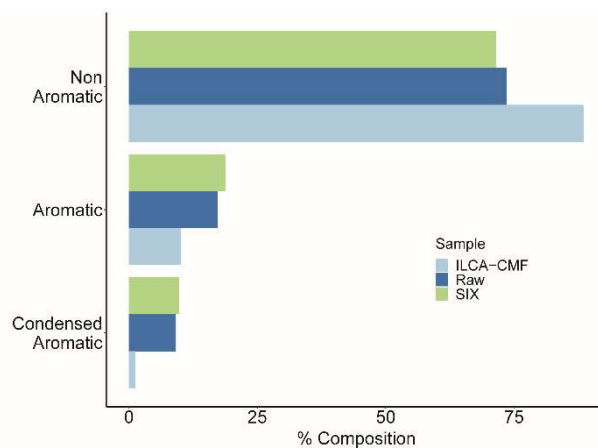

**Fig. S6.**  $AI_{mod}$  plot for the June pilot plant samples. There are far less condensed aromatic species present after the ILCA-CMF treatment.

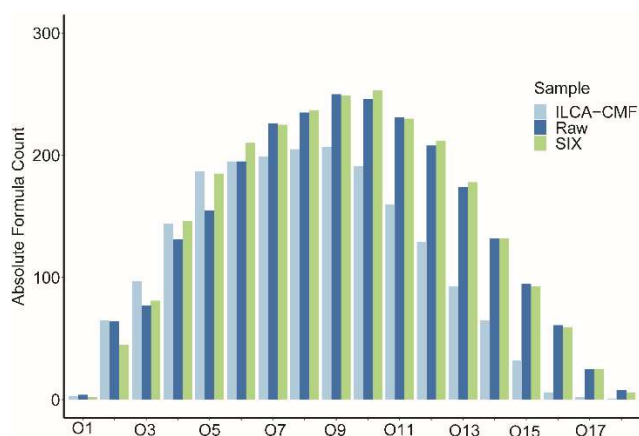

**Fig. S7.** Oxygen series plot for pilot plant June samples.

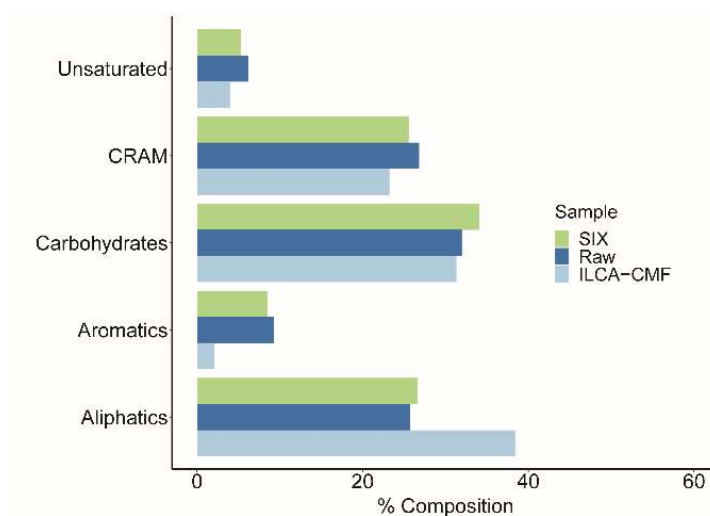

**Fig. S8.** Relative integrals of regions (shown in Figure 7 of the main article) of  $^1H$  NMR spectra of the pilot plant June samples.

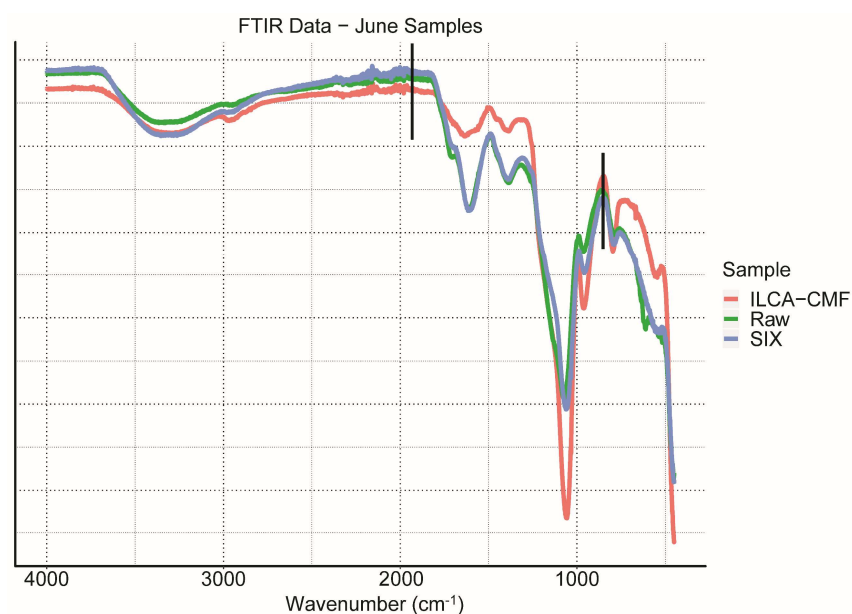

**Fig. S9.** ATR-FT-IR spectra of July pilot plant samples. The 800-2000 cm<sup>-1</sup> region indicated by two black lines was used for the PCA.

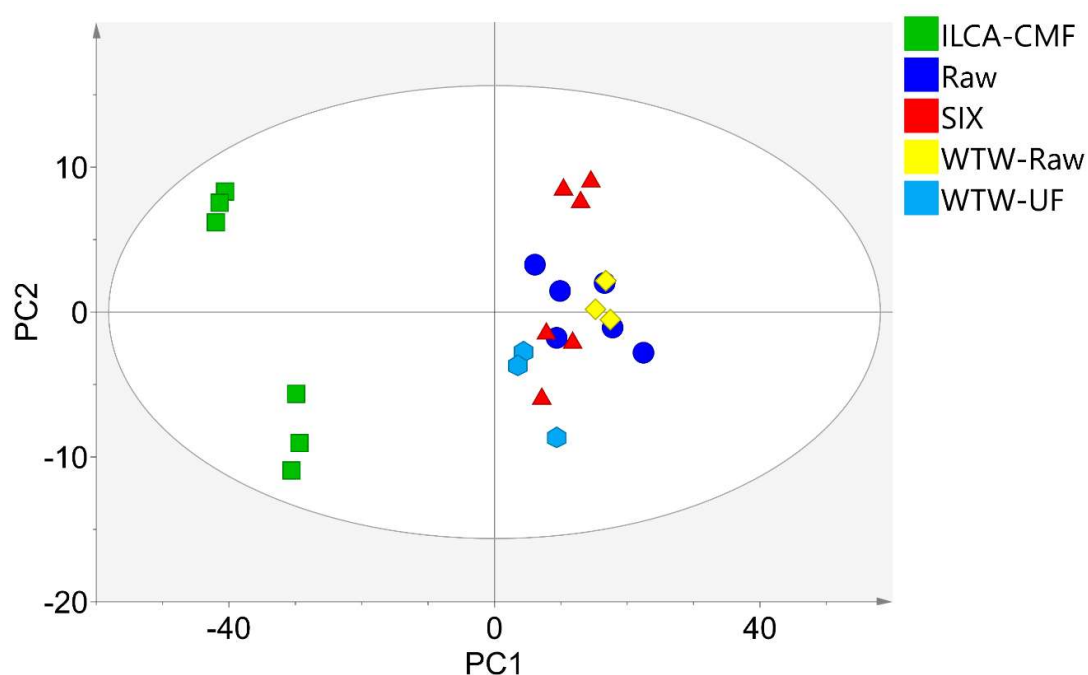

**Fig. S10.** PCA scores plot of the 800-2000 cm<sup>-1</sup> region of the ATR-FT-IR spectra of the July samples (identical plot to Fig. 9a of the main article using shapes to indicate differences between sample types and not the time of collection). **Squares** – ILCA-CMF samples, **Circles** – raw samples, **Triangles** – SIX treated samples, **Diamonds** – WTW-raw samples and **hexagons** – WTW-UF samples.

**Table S1.** Molecular masses and formulae used to calibrate the FT-ICR-MS spectra of DOM samples.

| m/z        | Charge | Formula   |
|------------|--------|-----------|
| 149.060803 | -1     | C9H9O2    |
| 153.019332 | -1     | C7H5O4    |
| 259.045941 | -1     | C10H11O8  |
| 273.061591 | -1     | C11H13O8  |
| 287.077241 | -1     | C12H15O8  |
| 301.092891 | -1     | C13H17O8  |
| 315.108541 | -1     | C14H19O8  |
| 329.124191 | -1     | C15H21O8  |
| 343.139841 | -1     | C16H23O8  |
| 357.155491 | -1     | C17H25O8  |
| 371.098370 | -1     | C16H19O10 |
| 385.114020 | -1     | C17H21O10 |
| 399.129671 | -1     | C18H23O10 |
| 413.145321 | -1     | C19H25O10 |
| 427.160971 | -1     | C20H27O10 |
| 441.103850 | -1     | C19H21O12 |
| 455.119500 | -1     | C20H23O12 |
| 469.135150 | -1     | C21H25O12 |
| 483.150800 | -1     | C22H27O12 |
| 497.166450 | -1     | C23H29O12 |
| 511.182100 | -1     | C24H31O12 |
| 525.197750 | -1     | C25H33O12 |
| 539.213400 | -1     | C26H35O12 |
| 545.020908 | -1     | C23H13O16 |
| 559.036558 | -1     | C24H15O16 |
| 573.052208 | -1     | C25H17O16 |
| 587.067858 | -1     | C26H19O16 |
| 601.083508 | -1     | C27H21O16 |
| 615.099158 | -1     | C28H23O16 |
| 629.114808 | -1     | C29H25O16 |
| 643.130458 | -1     | C30H27O16 |
| 657.146108 | -1     | C31H29O16 |
| 671.161758 | -1     | C32H31O16 |
| 685.177409 | -1     | C33H33O16 |
| 699.083902 | -1     | C31H23O19 |
| 713.099552 | -1     | C32H25O19 |
| 727.115202 | -1     | C33H27O19 |
| 741.130852 | -1     | C34H29O19 |
| 755.146502 | -1     | C35H31O19 |
